# Supplementary material for: A nanosystem loaded with perfluorohexane and rose bengal coupled upconversion nanoparticles for multimodal imaging and synergetic chemo-photodynamic therapy of cancer
Source: Royal Society of Chemistry journal article supplement (doi:10.1039/c9bm02081k), 2020-01-01
Supplement: c9bm02081k3.pdf [file c9bm02081k3.pdf]

# A Nanosystem Loaded Perfluorohexane and Rose Bengal Coupled Upconversion Nanoparticles for Multimodal Imaging and Synergetic Chemo-Photodynamic Therapy in Cancer

Hai-yan Wang, † <sup>a, b</sup> Li Hou, † <sup>c</sup> Hai-Liang Li, <sup>d</sup> Xu Wang, <sup>e</sup> Yang Cao, <sup>a</sup> Bo-yu Zhang, <sup>f</sup> Jingtao Wang, <sup>g</sup>  
Shi-Jie Wei, <sup>h</sup> Hong-Wan Dang, <sup>h</sup> Hai-Tao Ran <sup>a #</sup>

<sup>a</sup> Chongqing Key Laboratory of Ultrasound Molecular Imaging, Institute of Ultrasound Imaging, Second Affiliated Hospital, Chongqing Medical University, Chongqing, 400010, P. R. China.

<sup>b</sup> Department of Gynaecology, General Hospital of Ningxia Medical University, Yin- chuan, 750004, Ningxia, P.R. China

<sup>c</sup> Department of Otolaryngology, Head and Neck Surgery, General Hospital of Ningxia Medical University, Yinchuan, 750004, Ningxia, P.R. China

<sup>d</sup> Department of Radiation Oncology, General Hospital of Ningxia Medical University, Yinchuan, 750004, Ningxia, P.R. China

<sup>e</sup> Department of Neurosurgery, 1<sup>st</sup> Hospital of Yin Chuan, 2<sup>nd</sup> Affiliated Hospital of Ningxia Medical University, Yinchuan, 750004, P.R. China

<sup>f</sup> School of Clinical Medicine Fujian Medical University, Fuzhou, 350000, P.R. China

<sup>g</sup> School of Pharmaceutical Science, Southwest University, Chongqing, 40071

<sup>h</sup> Institute of Clinical Pharmacology and Department of Pharmacy, General Hospital of Ningxia Medical University, Yinchuan, 750004, Ningxia, P.R. China

† Authors Haiyan Wang and Li Hou contributed equally to this work.

# Corresponding Author.

## supplementary materials

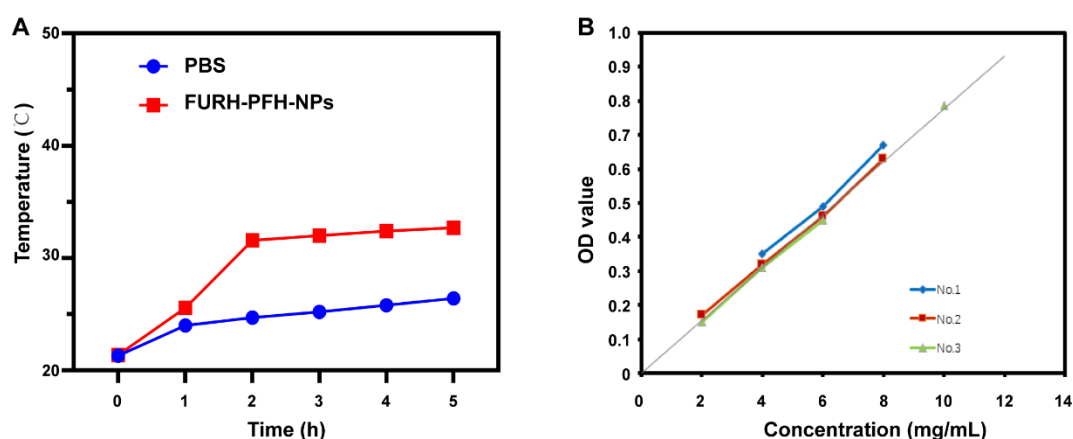

Fig. S (A) Time course of the temperature change. (B) The standard curve rose Bengal.
